# Supplementary material for: North Atlantic deep-sea benthic biodiversity unveiled through sponge natural sampler DNA
Source: Research Square preprint supplement (doi:10.21203/rs.3.rs-3710632/v1), 2024-01-09
Supplement: Supplementary file 1 [file 04993d797af5634f334650c5.xlsx]

## Sheet: Sheet1
BIOGEOGRAPHIC REGION
NE Atlantic	stat	p.value	significance
Axinella infundibuliformis	0.765	0.018	*
Echinodictyum sp.	0.681	0.031	*
Orthopyxis caliculata	0.681	0.029	*
Ptilocaulis sp.	0.679	0.034	*
Haemadipsa interrupta	0.644	0.024	*
Lepidorhombus whiffiagonis	0.58	0.037	*
Open NW Atlantic	stat	p.value	significance
Ectyonopsis sp.	0.682	0.005	**
Protosuberites sp.	0.61	0.032	*
DEPTH
Shallow	stat	p.value	significance
Melanogrammus aeglefinus	0.691	0.001	***
Eutrigla gurnardus	0.69	0.001	***
Lepidorhombus whiffiagonis	0.654	0.001	***
Paraphelliactis xishaensis	0.625	0.001	***
Argentina sp.hyraena	0.59	0.001	***
Gadiculus argenteus	0.584	0.001	***
Micromesistius poutassou	0.577	0.001	***
Parastichopus tremulus	0.561	0.007	**
Sebastes norvegicus	0.551	0.001	***
Molva molva	0.546	0.001	***
Gadus morhua	0.541	0.001	***
Ammodytes marinus	0.511	0.001	***
Microstomus kitt	0.511	0.001	***
Dipturus batis	0.51	0.001	***
Porania pulvillus	0.509	0.001	***
Cyanea lamarckii	0.504	0.001	***
Lophius piscatorius	0.499	0.001	***
Desmacella cf annexa	0.488	0.002	**
Clathria sp.	0.482	0.003	**
Maurolicus muelleri	0.466	0.002	**
Hippasteria phrygiana	0.466	0.001	***
Echinus esculentus	0.466	0.001	***
Luidia ciliaris	0.466	0.002	**
Helicolenus dactylopterus	0.466	0.002	**
Abyssocladia sp.	0.453	0.006	**
sp.irastrella sp.	0.443	0.013	*
Eucheilota maculata	0.421	0.035	*
Scopalina sp.	0.417	0.004	**
Scomber scombrus	0.417	0.008	**
Todarodes sagittatus	0.417	0.006	**
Merlangius merlangus	0.417	0.006	**
sp.atangus multisp.inus	0.415	0.012	*
Hippoglossoides platessoides	0.414	0.029	*
Loligo forbesii	0.409	0.016	*
Chaetopterus sarsii	0.361	0.018	*
Calliactis parasitica	0.361	0.02	*
Clupea harengus	0.361	0.02	*
Luidia sarsi	0.361	0.022	*
Eledone cirrhosa	0.361	0.013	*
Funiculina quadrangularis	0.361	0.013	*
Meganyctiphanes norvegica	0.361	0.013	*
Ophiocten affinis	0.361	0.024	*
Trisopterus minutus	0.361	0.022	*
Hybocodon prolifer	0.361	0.02	*
Aurelia aurita	0.352	0.048	*
sp.atangus purpureus	0.348	0.038	*
Biomphalaria glabrata	0.343	0.048	*
Mesobenthonic	stat	p.value	significance
Phacellophora camtschatica	0.43	0.014	*
Petrosia crassa	0.43	0.046	*
Acanthascus dawsoni	0.407	0.042	*
Deep	stat	p.value	significance
Geodia parva	0.813	0.001	***
Hamacantha falcula	0.778	0.001	***
Xenosyllis moloch	0.667	0.001	***
Thenea levis	0.436	0.02	*
Ophiactis abyssicola	0.422	0.006	**
Antimora rostrata	0.387	0.005	**
Coryphaenoides rupestris	0.38	0.017	*
Bathylagus euryops	0.362	0.029	*
Zancleopsis cabela	0.316	0.05	*
Hydrolagus affinis	0.316	0.04	*
Eudendrium capillare	0.316	0.046	*
