# Supplementary material for: North Atlantic deep-sea benthic biodiversity unveiled through sponge natural sampler DNA
Source: Research Square preprint supplement (doi:10.21203/rs.3.rs-3710632/v1), 2024-01-09
Supplement: Supplementary file 2 [file 2693f7d940235dda7d9979f6.xlsx]

## Sheet: stats
ANOVA TESTS for alpha diversity							PERMANOVA TESTS for beta diversity
A.1) Biogeography							B.1) All sponges
Analysis of variance (ANOVA)							Global Test (Region)	Df	Sum of Squares	R2	F	Pr(>F)
	Df	Sum Sq	Mean Sq	F value	Pr(>F)		biogeographic	3	3.502	0.07983	2.6895	0.001
biogeography	3	5.7	1.916	4.92	0.0032		Residual	93	40.37	0.92017
Residuals	93	36.2	0.389				Total	96	43.872	1
Tukey’s Honest Significant Difference (HSD)							Pairwise test (Region)	Df	Sum of Squares	R2	F	Pr(>F)
	diff	lwr	upr	p adj			NEA vs Artic	1	1.55507	0.0354453	3.58241	0.001
NE Atlantic-Arctic	0.478709	0.00797017	0.949448	0.0447054			NAB vs Arctic	1	1.01884	0.0232229	2.34711	0.001
North Atlantic Boreal-Arctic	-0.0257049	-0.503844	0.452434	0.999			Artic vs. ONWA	1	0.595156	0.0135656	1.37106	0.051
Open NW Atlantic-Arctic	0.192413	-1.02747	1.4123	0.976172			NAB vs NEA	1	2.34893	0.05354	5.41122	0.001
North Atlantic Boreal-NE Atlantic	-0.504414	-0.874444	-0.134384	0.0031722			NEA vs ONWA	1	2.23134	0.0508598	5.14033	0.001
Open NW Atlantic-NE Atlantic	-0.286296	-1.468	0.89541	0.920863			NAB vs ONWA	1	1.49935	0.0341753	3.45405	0.001
Open NW Atlantic-North Atlantic Boreal	0.218118	-0.966556	1.40279	0.96298			Residual	93	40.3699	0.920167	NA	NA
A.2) Depth code							Global Test (Depth)	Df	Sum of Squares	R2	F	Pr(>F)
Analysis of variance (ANOVA)							depth	2	3.2	0.074	3.67	0.001
	Df	Sum Sq	Mean Sq	F value	Pr(>F)		Residual	92	39.9	0.926
depth_code	2	2.053	1.0264	2.4192	0.09452		Total	94	43.1	1
Residuals	94	39.882	0.42427
A.3) Site							Pairwise test (Depth)	Df	Sum of Squares	R2	F	Pr(>F)
Analysis of variance (ANOVA)							shallow vs meso	1	0.92	0.021	2.1	0.001
	Df	Sum Sq	Mean Sq	F value	Pr(>F)		shallow vs deep	1	2.24	0.052	5.2	0.001
Site	19	12.7	0.668	1.76	0.044		meso vs deep	1	1.32	0.031	3	0.001
Residuals	77	29.2	0.38				Residual	92	39.89	0.926	NA	NA
							B.2) Only Geodia barretti
Tukey’s Honest Significant Difference (HSD)							Global test (Region)	Df	Sum of Squares	R2	F	Pr(>F)
	diff	lwr	upr	p adj			biogeographic region	2	1.67	0.11	1.98	0.001
Sweden-Jan Mayen Ridge	1.57963	0.0626289	3.09664	0.0321897			Residual	32	13.54	0.89
Sweden-Barents Sea	1.39275	0.00792491	2.77758	0.0471017			Total	34	15.21	1
Vesterisbanken-Sweden	-1.35142	-2.71036	0.00752265	0.0529509
Sweden-Paamiut	1.36319	-0.0965501	2.82293	0.0964261			Pairwise test (Region)	Df	Sum of Squares	R2	F	Pr(>F)
W Rosemary bank-Sweden	-1.56188	-3.28907	0.165302	0.126598			NAB vs NEA	1	0.96	0.063	2.26	0.001
Sweden-Schultz Massif	1.32882	-0.188186	2.84582	0.162164			NAB vs Arctic	1	1.09	0.072	2.58	0.001
Sweden-Davis Strait	1.21515	-0.202269	2.63257	0.189425			NEA vs Artic	1	0.42	0.028	0.99	0.47
Sweden-Karassik Seamount	1.35984	-0.239224	2.9589	0.200319			Residual	32	13.54	0.89	NA	NA
Tromsø shelf-Jan Mayen Ridge	1.2429	-0.408605	2.89441	0.401267
Tromsø shelf-Barents Sea	1.05602	-0.474965	2.58701	0.564556
Vesterisbanken-Tromsø shelf	-1.01469	-2.5223	0.492924	0.609254
Sweden-Svalbard	1.00756	-0.509444	2.52457	0.632758
W Rosemary bank-Tromsø shelf	-1.22515	-3.07159	0.621289	0.634493
Tromsø shelf-Paamiut	1.02645	-0.572608	2.62552	0.690506
Sweden-Norway	0.898071	-0.519347	2.31549	0.711379
Sweden-Rockall Bank	0.87038	-0.514449	2.25521	0.723912
Tromsø shelf-Schultz Massif	0.992085	-0.65942	2.64359	0.788546
Sweden-Shetland Shelf North	1.03716	-0.690023	2.76435	0.789033
Tromsø shelf-Karassik Seamount	1.02311	-0.704079	2.75029	0.806495
Jan Mayen Ridge-Faroe Shetland Sponge Belt	-0.799108	-2.16846	0.570247	0.824518
Tromsø shelf-Davis Strait	0.878416	-0.68211	2.43894	0.863229
Sweden-Iceland	0.89845	-0.700613	2.49751	0.865029
Sweden-Orphan Knoll	1.0793	-0.87914	3.03775	0.882884
Rockall Bank-Jan Mayen Ridge	0.709253	-0.579952	1.99846	0.884397
Sweden-Sula Reef	0.859605	-0.739458	2.45867	0.903192
Sweden-Faroe Shetland Sponge Belt	0.780525	-0.679213	2.24026	0.907183
Norway-Jan Mayen Ridge	0.681562	-0.642588	2.00571	0.932039
Faroe Shetland Sponge Belt-Barents Sea	0.612229	-0.609075	1.83353	0.945907
W Rosemary bank-Faroe Shetland Sponge Belt	-0.781358	-2.38042	0.817705	0.957021
North of Shetland-Jan Mayen Ridge	0.801334	-0.850171	2.45284	0.959715
Vesterisbanken-Faroe Shetland Sponge Belt	-0.570895	-1.76277	0.620976	0.964296
Sula Reef-Jan Mayen Ridge	0.720028	-0.796976	2.23703	0.967261
Rockall Bank-Barents Sea	0.522374	-0.608334	1.65308	0.974833
W Rosemary bank-Rockall Bank	-0.691503	-2.22249	0.839483	0.979949
Sweden-North of Shetland	0.778299	-0.948886	2.50548	0.980422
Jan Mayen Ridge-Iceland	-0.681183	-2.19819	0.835821	0.981117
Paamiut-Faroe Shetland Sponge Belt	-0.582663	-1.88829	0.722966	0.982282
Vesterisbanken-Rockall Bank	-0.48104	-1.57989	0.617811	0.985518
W Rosemary bank-Norway	-0.663812	-2.22434	0.896714	0.989372
W Rosemary bank-North of Shetland	-0.783584	-2.63002	1.06285	0.989643
Norway-Barents Sea	0.494683	-0.675711	1.66508	0.990094
W Rosemary bank-Sula Reef	-0.702278	-2.42946	1.02491	0.993596
Tromsø shelf-Svalbard	0.670828	-0.980677	2.32233	0.99367
Sweden-Mohn	1.02062	-1.50773	3.54896	0.994109
Rockall Bank-Paamiut	0.492808	-0.728497	1.71411	0.994136
North of Shetland-Barents Sea	0.614455	-0.916531	2.14544	0.994491
Schultz Massif-Faroe Shetland Sponge Belt	-0.548293	-1.91765	0.821063	0.99464
Svalbard-Jan Mayen Ridge	0.572072	-0.858173	2.00232	0.994705
Vesterisbanken-Norway	-0.453349	-1.593	0.686298	0.995034
Karassik Seamount-Faroe Shetland Sponge Belt	-0.579314	-2.03905	0.880424	0.99517
Sula Reef-Barents Sea	0.533149	-0.85168	1.91798	0.996638
W Rosemary bank-Iceland	-0.663433	-2.39062	1.06375	0.99673
Vesterisbanken-North of Shetland	-0.57312	-2.08073	0.934491	0.997118
Tromsø shelf-Shetland Shelf North	0.70043	-1.14601	2.54687	0.997192
Paamiut-Norway	-0.465117	-1.72325	0.793019	0.99796
Paamiut-North of Shetland	-0.584889	-2.18395	1.01417	0.998216
Vesterisbanken-Sula Reef	-0.491815	-1.85076	0.867127	0.998441
Tromsø shelf-Norway	0.561338	-0.999188	2.12186	0.998558
Tromsø shelf-Orphan Knoll	0.742572	-1.32181	2.80695	0.998558
Iceland-Barents Sea	0.494304	-0.890525	1.87913	0.998694
Schultz Massif-Rockall Bank	-0.458438	-1.74764	0.830768	0.998757
Rockall Bank-Karassik Seamount	0.489459	-0.89537	1.87429	0.998851
Tromsø shelf-Rockall Bank	0.533647	-0.997339	2.06463	0.999041
Faroe Shetland Sponge Belt-Davis Strait	0.434624	-0.823512	1.69276	0.999148
Sula Reef-Paamiut	0.503583	-0.956155	1.96332	0.999163
North of Shetland-Karassik Seamount	0.58154	-1.14565	2.30873	0.999395
W Rosemary bank-Svalbard	-0.554322	-2.20583	1.09718	0.99942
Schultz Massif-North of Shetland	-0.550519	-2.20202	1.10099	0.999472
Vesterisbanken-Iceland	-0.452969	-1.81191	0.905973	0.999472
Shetland Shelf North-Jan Mayen Ridge	0.542471	-1.10903	2.19398	0.999568
Norway-Karassik Seamount	0.461768	-0.95565	1.87919	0.999614
Schultz Massif-Norway	-0.430747	-1.7549	0.893403	0.999621
Tromsø shelf-Iceland	0.561717	-1.16547	2.2889	0.999623
Paamiut-Iceland	-0.464738	-1.92448	0.995	0.999719
Sula Reef-Karassik Seamount	0.500234	-1.09883	2.0993	0.99978
Sula Reef-Schultz Massif	0.469213	-1.04779	1.98622	0.999813
Tromsø shelf-Sula Reef	0.522872	-1.20431	2.25006	0.999862
Svalbard-Barents Sea	0.385193	-0.904012	1.6744	0.999886
Rockall Bank-Davis Strait	0.344769	-0.825625	1.51516	0.999907
Karassik Seamount-Iceland	-0.461389	-2.06045	1.13767	0.999932
W Rosemary bank-Shetland Shelf North	-0.52472	-2.37116	1.32172	0.999945
Schultz Massif-Iceland	-0.430368	-1.94737	1.08664	0.999947
North of Shetland-Davis Strait	0.43685	-1.12368	1.99738	0.999956
Tromsø shelf-Faroe Shetland Sponge Belt	0.443792	-1.15527	2.04285	0.999962
Jan Mayen Ridge-Davis Strait	-0.364484	-1.68863	0.959665	0.999966
Vesterisbanken-Svalbard	-0.343859	-1.60522	0.917499	0.999971
Orphan Knoll-Jan Mayen Ridge	0.500329	-1.39171	2.39237	0.999982
Norway-Davis Strait	0.317078	-0.8917	1.52586	0.999984
Tromsø shelf-Mohn	0.683882	-1.92738	3.29514	0.999984
Svalbard-Paamiut	0.355627	-1.01373	1.72498	0.999986
Sula Reef-Davis Strait	0.355544	-1.06187	1.77296	0.999992
Tromsø shelf-North of Shetland	0.441566	-1.40487	2.288	0.999996
W Rosemary bank-Orphan Knoll	-0.482578	-2.54696	1.5818	0.999997
Shetland Shelf North-Barents Sea	0.355591	-1.17539	1.88658	0.999998
Svalbard-Karassik Seamount	0.352278	-1.16473	1.86928	0.999998
Mohn-Jan Mayen Ridge	0.559018	-1.91824	3.03628	0.999999
Svalbard-Schultz Massif	0.321257	-1.10899	1.7515	0.999999
Iceland-Davis Strait	0.316699	-1.10072	1.73412	0.999999
W Rosemary bank-Davis Strait	-0.346734	-1.90726	1.21379	0.999999
W Rosemary bank-Mohn	-0.541268	-3.15253	2.06999	1
Vesterisbanken-Shetland Shelf North	-0.314257	-1.82187	1.19335	1
Shetland Shelf North-Paamiut	0.326025	-1.27304	1.92509	1
Shetland Shelf North-Karassik Seamount	0.322676	-1.40451	2.04986	1
Tromsø shelf-Sweden	-0.336733	-2.06392	1.39045	1
Davis Strait-Barents Sea	0.177605	-0.992789	1.348	1
Jan Mayen Ridge-Barents Sea	-0.186879	-1.47608	1.10233	1
Karassik Seamount-Barents Sea	0.0329151	-1.35191	1.41774	1
Mohn-Barents Sea	0.372139	-2.02646	2.77073	1
Orphan Knoll-Barents Sea	0.31345	-1.47436	2.10126	1
Paamiut-Barents Sea	0.0295661	-1.19174	1.25087	1
Schultz Massif-Barents Sea	0.063936	-1.22527	1.35314	1
Vesterisbanken-Barents Sea	0.0413345	-1.05752	1.14019	1
W Rosemary bank-Barents Sea	-0.169129	-1.70012	1.36186	1
Karassik Seamount-Davis Strait	-0.14469	-1.56211	1.27273	1
Mohn-Davis Strait	0.194533	-2.22302	2.61209	1
Orphan Knoll-Davis Strait	0.135844	-1.67732	1.94901	1
Paamiut-Davis Strait	-0.148039	-1.40618	1.1101	1
Schultz Massif-Davis Strait	-0.113669	-1.43782	1.21048	1
Shetland Shelf North-Davis Strait	0.177986	-1.38254	1.73851	1
Svalbard-Davis Strait	0.207588	-1.11656	1.53174	1
Vesterisbanken-Davis Strait	-0.136271	-1.27592	1.00338	1
Iceland-Faroe Shetland Sponge Belt	-0.117925	-1.57766	1.34181	1
Mohn-Faroe Shetland Sponge Belt	-0.240091	-2.6827	2.20252	1
North of Shetland-Faroe Shetland Sponge Belt	0.00222579	-1.59684	1.60129	1
Norway-Faroe Shetland Sponge Belt	-0.117546	-1.37568	1.14059	1
Orphan Knoll-Faroe Shetland Sponge Belt	-0.29878	-2.14522	1.54766	1
Rockall Bank-Faroe Shetland Sponge Belt	-0.0898551	-1.31116	1.13145	1
Shetland Shelf North-Faroe Shetland Sponge Belt	-0.256638	-1.8557	1.34243	1
Sula Reef-Faroe Shetland Sponge Belt	-0.07908	-1.53882	1.38066	1
Svalbard-Faroe Shetland Sponge Belt	-0.227036	-1.59639	1.14232	1
Mohn-Iceland	-0.122165	-2.65051	2.40618	1
North of Shetland-Iceland	0.120151	-1.60703	1.84734	1
Norway-Iceland	0.000379251	-1.41704	1.4178	1
Orphan Knoll-Iceland	-0.180854	-2.1393	1.77759	1
Rockall Bank-Iceland	0.0280701	-1.35676	1.4129	1
Shetland Shelf North-Iceland	-0.138713	-1.8659	1.58847	1
Sula Reef-Iceland	0.0388453	-1.56022	1.63791	1
Svalbard-Iceland	-0.109111	-1.62611	1.40789	1
Karassik Seamount-Jan Mayen Ridge	0.219794	-1.29721	1.7368	1
Paamiut-Jan Mayen Ridge	0.216445	-1.15291	1.5858	1
Schultz Massif-Jan Mayen Ridge	0.250815	-1.17943	1.68106	1
Vesterisbanken-Jan Mayen Ridge	0.228214	-1.03314	1.48957	1
W Rosemary bank-Jan Mayen Ridge	0.0177503	-1.63375	1.66926	1
Mohn-Karassik Seamount	0.339224	-2.18912	2.86756	1
Orphan Knoll-Karassik Seamount	0.280534	-1.67791	2.23898	1
Paamiut-Karassik Seamount	-0.00334895	-1.46309	1.45639	1
Schultz Massif-Karassik Seamount	0.031021	-1.48598	1.54803	1
Vesterisbanken-Karassik Seamount	0.00841945	-1.35052	1.36736	1
W Rosemary bank-Karassik Seamount	-0.202044	-1.92923	1.52514	1
North of Shetland-Mohn	0.242316	-2.36894	2.85358	1
Norway-Mohn	0.122545	-2.29501	2.5401	1
Orphan Knoll-Mohn	-0.0586891	-2.82835	2.71097	1
Paamiut-Mohn	-0.342573	-2.78518	2.10004	1
Rockall Bank-Mohn	0.150235	-2.24836	2.54883	1
Schultz Massif-Mohn	-0.308203	-2.78546	2.16906	1
Shetland Shelf North-Mohn	-0.0165474	-2.62781	2.59471	1
Sula Reef-Mohn	0.161011	-2.36733	2.68935	1
Svalbard-Mohn	0.0130546	-2.4642	2.49031	1
Vesterisbanken-Mohn	-0.330804	-2.71455	2.05294	1
Norway-North of Shetland	-0.119772	-1.6803	1.44075	1
Orphan Knoll-North of Shetland	-0.301005	-2.36539	1.76338	1
Rockall Bank-North of Shetland	-0.0920809	-1.62307	1.43891	1
Shetland Shelf North-North of Shetland	-0.258864	-2.1053	1.58758	1
Sula Reef-North of Shetland	-0.0813058	-1.80849	1.64588	1
Svalbard-North of Shetland	-0.229262	-1.88077	1.42224	1
Orphan Knoll-Norway	-0.181234	-1.9944	1.63193	1
Rockall Bank-Norway	0.0276909	-1.1427	1.19809	1
Shetland Shelf North-Norway	-0.139092	-1.69962	1.42143	1
Sula Reef-Norway	0.038466	-1.37895	1.45588	1
Svalbard-Norway	-0.10949	-1.43364	1.21466	1
Paamiut-Orphan Knoll	-0.283883	-2.13032	1.56256	1
Rockall Bank-Orphan Knoll	0.208925	-1.57888	1.99673	1
Schultz Massif-Orphan Knoll	-0.249513	-2.14155	1.64252	1
Shetland Shelf North-Orphan Knoll	0.0421418	-2.02224	2.10652	1
Sula Reef-Orphan Knoll	0.2197	-1.73874	2.17814	1
Svalbard-Orphan Knoll	0.0717438	-1.82029	1.96378	1
Vesterisbanken-Orphan Knoll	-0.272115	-2.03995	1.49572	1
Schultz Massif-Paamiut	0.0343699	-1.33499	1.40373	1
Vesterisbanken-Paamiut	0.0117684	-1.1801	1.20364	1
W Rosemary bank-Paamiut	-0.198695	-1.79776	1.40037	1
Shetland Shelf North-Rockall Bank	-0.166783	-1.69777	1.3642	1
Sula Reef-Rockall Bank	0.0107751	-1.37405	1.3956	1
Svalbard-Rockall Bank	-0.137181	-1.42639	1.15202	1
Shetland Shelf North-Schultz Massif	0.291655	-1.35985	1.94316	1
Vesterisbanken-Schultz Massif	-0.0226015	-1.28396	1.23876	1
W Rosemary bank-Schultz Massif	-0.233065	-1.88457	1.41844	1
Sula Reef-Shetland Shelf North	0.177558	-1.54963	1.90474	1
Svalbard-Shetland Shelf North	0.029602	-1.6219	1.68111	1
Svalbard-Sula Reef	-0.147956	-1.66496	1.36905	1
W Rosemary bank-Vesterisbanken	-0.210463	-1.71807	1.29715	1
